# Supplementary material for: Chloroplast and mitochondrial genetic variation of larches at the Siberian tundra-taiga ecotone revealed by de novo assembly
Source: PubMed Central journal article supplement (PMC6619608; doi:10.1371/journal.pone.0216966), 2019-07-10
Supplement: pone.0216966.s001.pdf [file pone.0216966.s001.pdf]

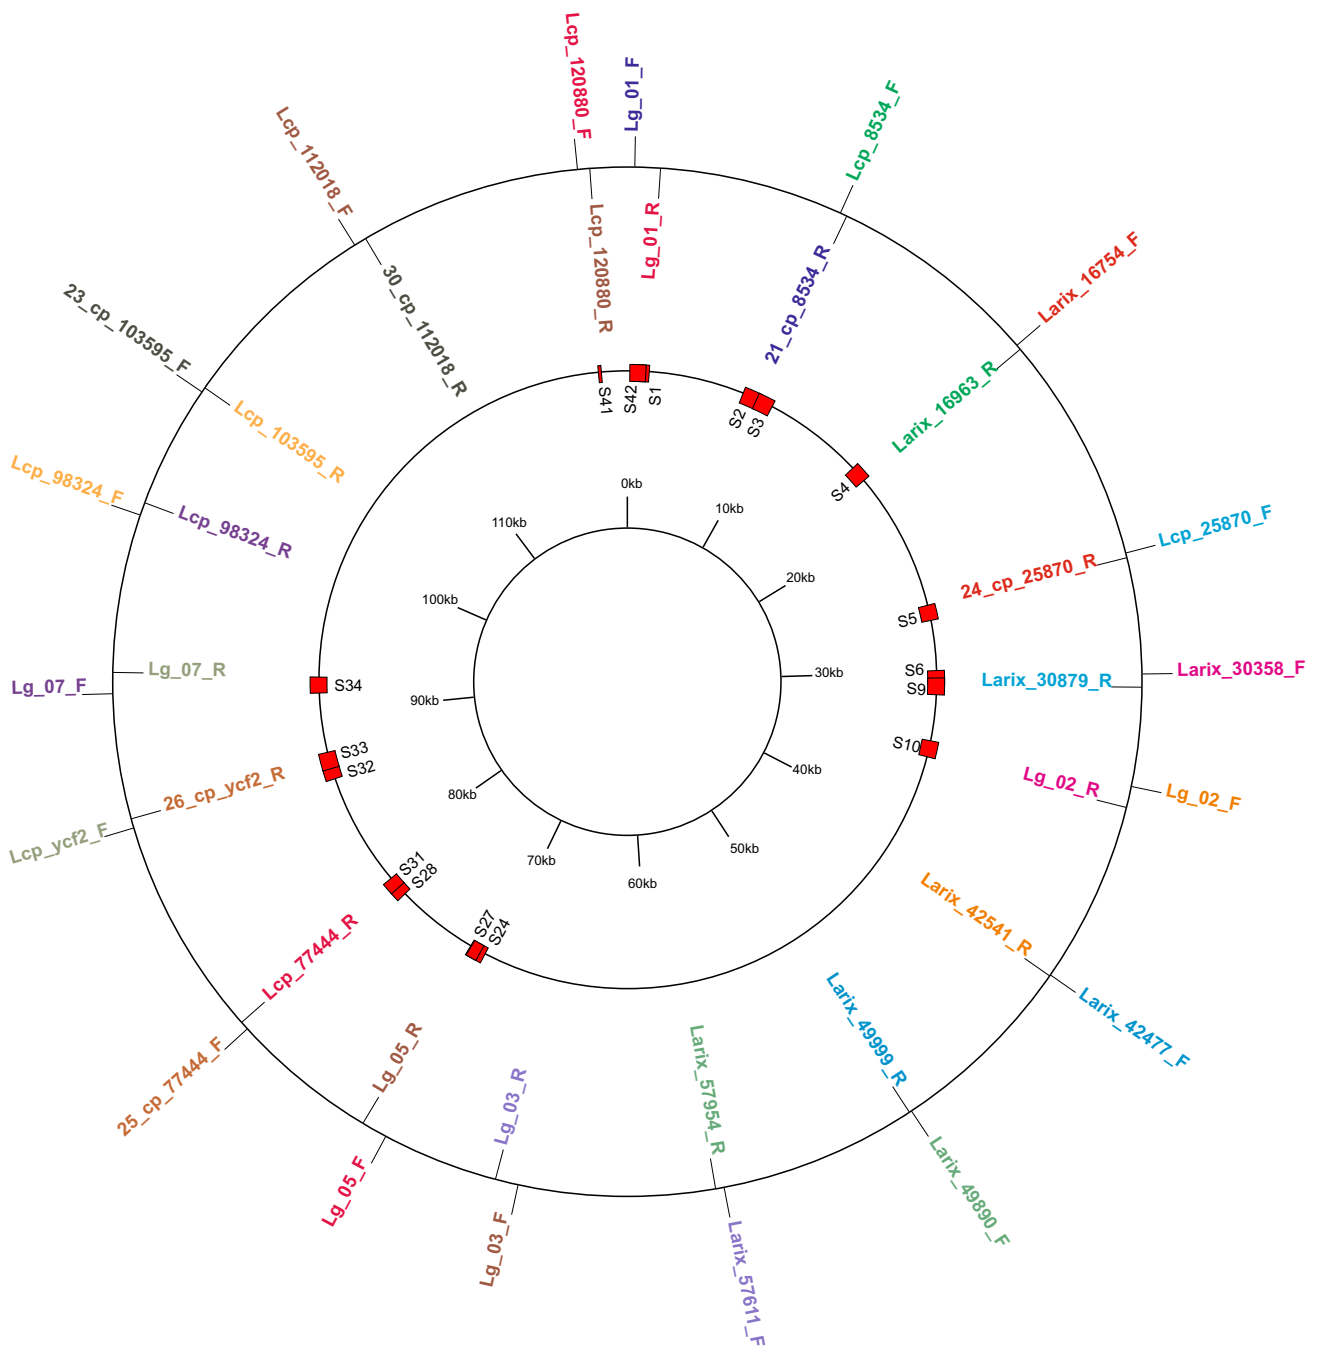

**S1 Figure. Map showing the position of primer pairs for long-range PCRs.** The outer circle shows the positions of the 18 primer pairs for long-range PCRs. The second circle shows the re-sequenced parts of the chloroplast genomes after long-range PCR. The innermost circle represents the length of the *Larix gmelinii* and *Larix cajanderi* chloroplast genome in kilo base pairs (kb).
