# Supplementary material for: Chloroplast and mitochondrial genetic variation of larches at the Siberian tundra-taiga ecotone revealed by de novo assembly
Source: PLoS One. 2019 Jul 10;14(7):e0216966. doi: 10.1371/journal.pone.0216966 (PMC6619608; doi:10.1371/journal.pone.0216966)
Supplement: S3 Table — (XLSX) [file pone.0216966.s004.xlsx]

## Sheet: Tabelle1
S3 Table. Nucleotide distribution of the Larix gmelinii/Larix cajanderi draft chloroplast genome.
Group	Nucleotides in Larix gmelinii/Larix cajanderi draft genome	Nucleotide distribution	GC content
total sequence	122590	A= 30.6%	0.387
		C= 18.8%
		G= 19.9%
		T= 30.7%
ribosomal RNA genes	4520	A= 26.4%	0.548
		C= 23.7%
		G= 31.1%
		T= 18.8%
transfer RNAs	2577	A= 23.1%	0.536
		C= 26.8%
		G= 26.9%
		T= 23.3%
protein coding sequences	61187	A= 30.5%	0.391
		C= 18.9%
		G= 20.2%
		T= 30.4%
